# Supplementary material for: Comparison between rasterstereographic scan and orthopedic examination for posture assessment: an observational study
Source: Front Surg. 2024 Oct 10;11:1461569. doi: 10.3389/fsurg.2024.1461569 (PMC11499226; doi:10.3389/fsurg.2024.1461569)
Supplement: Supplementary file 4 [file Table4.xlsx]

## Sheet: Additional File 3
Vpn	Geschlecht	GebDat	Größe	Gewicht	Untersuch_Dat	Alter_Untersuch	BMI	Übergewicht_jn	Untergewichtig_jn	Händigkeit	K_Untersucher	K_Schulterhochstand	K_Scapula_alata	K_Taillendreieck	K_Rippenbuckel_jn	K_Lendenwulst_jn	K_Beinachse_Typ	K_Beinachse_IC_Abstand	K_Beinachse_IM_Abstand	K_Fußstellung	K_sonst_dors_Auffaell	K_Knieachse	K_HWS_lateral	K_BWS_lateral	K_LWS_lateral	K_sonst_lat_Auffaell	K_Thoraxform	K_Gangbild	K_EBS_jn	K_Zehenspitzengang_jn	K_Fersengang_jn	K_WS_Klopfschmerz_jn	K_Nieren_Klopfschmerz_jn	K_ISG_Druckschmerz_jn	K_Beckenstand	K_Paravertebr_Muskeltonuserhoeh	K_Trapezius_Muskeltonuserhoeh	K_WS_Rot	K_WS_Seit	K_WS_Reklin	K_FBA	K_Lotabweichung	K_Schulterbew	K_Hüftbewegl	K_Popliteal_re	K_Popliteal_li	K_BL_Diff	K_Verkürzung_quad_fem	K_Verkürzung_ischios
1	2	2009-04-17	137	33	2018-06-05	9.1	17.6	0	0	3	1	1	1	1	1	1	5	0	3	1	0	1	1	3	2	0	1	1	1	1	1	1	1	1	1	2	2	1	1	1	15	1	1	1	30	30	1	1	1
2	2	2008-12-28	139	35.6	2018-06-05	9.4	18.1	0	0	1	1	1	1	1	1	3	5	0	1	12	0	1	1	1	1	0	4	1	1	1	1	1	1	1	1	2	2	1	1	1	0	1	1	1	0	0	1	1	1
3	1	2009-08-21	140	31.4	2018-06-05	8.8	15.8	0	0	2	1	1	1	1	1	1	1	0	0	1	0	1	1	1	1	0	1	1	1	1	1	1	1	1	1	2	2	1	1	1	18	1	1	1	30	30	1	2	2
4	2	2009-01-17	145	38.1	2018-06-05	9.3	18.1	0	0	1	1	1	1	1	1	1	5	0	2	12	1	1	1	1	1	0	1	1	1	1	1	1	1	1	1	2	2	1	1	1	0	1	1	1	10	10	1	1	1
5	1	2009-01-03	130.5	25.9	2018-06-05	9.4	14.8	0	0	1	1	1	4	1	1	1	1	0	0	1	0	1	1	1	1	0	1	1	1	1	1	1	1	1	1	2	2	1	1	1	0	1	1	1	10	10	1	1	1
6	2	2009-04-28	141	33.1	2018-06-05	9.1	16.6	0	0	1	1	2	1	1	1	1	1	0	0	1	0	1	1	3	3	0	1	1	1	1	1	1	1	1	1	2	2	1	1	1	0	1	1	1	0	0	1	1	1
7	2	2009-08-12	133.5	30.8	2018-06-05	8.8	17	0	0	1	1	3	4	3	1	3	1	0	0	1	0	1	1	3	3	0	1	1	1	1	1	1	1	1	1	2	2	1	1	1	0	1	1	1	0	0	1	1	1
8	2	2008-12-06	141	26.8	2018-06-12	9.5	13.1	0	1	1	1	1	1	2	1	2	1	0	0	5	0	1	1	1	1	0	1	1	1	1	1	1	1	1	2	2	2	1	1	1	5	1	1	1	15	15	2	1	1
9	2	2009-09-25	130.5	25.6	2018-06-12	8.7	14.8	0	0	1	1	2	3	2	1	1	1	0	0	11	0	1	1	3	1	0	1	1	1	1	1	1	1	1	1	2	2	2	2	2	15	1	1	1	15	15	1	1	1
10	1	2009-03-14	133	31	2018-06-12	9.2	18.3	0	0	1	1	1	1	1	1	1	1	0	0	1	0	1	1	1	1	0	1	1	1	1	1	1	1	1	1	2	2	1	1	1	0	1	1	1	20	20	1	1	1
11	1	2007-12-20	137.5	33.8	2018-06-12	10.4	17.6	0	0	1	1	1	1	1	1	1	1	0	0	2	0	1	1	1	1	0	1	1	1	1	1	1	1	1	1	2	2	1	1	1	0	1	1	1	5	0	1	1	1
12	1	2008-11-19	136.5	31.7	2018-06-12	9.5	16.8	0	0	1	1	3	1	1	1	1	1	0	0	1	0	1	1	1	1	0	1	1	1	1	1	1	1	1	1	2	2	1	1	1	8	1	1	1	15	15	1	2	2
13	1	2008-07-22	143	30.7	2018-06-12	9.8	14.7	0	0	1	1	3	4	3	1	3	1	0	0	12	0	1	1	1	1	0	1	1	1	1	1	1	1	1	1	2	2	1	1	1	0	1	1	1	5	5	1	1	1
14	2	2009-03-02	132	30.2	2018-06-12	9.3	17.2	0	0	1	1	2	1	3	1	1	4	0	4	12	0	1	1	1	1	0	1	1	1	1	1	1	1	1	1	2	2	2	2	2	4	1	2	1	5	5	1	1	1
15	2	2009-09-21	127.5	30.1	2018-06-19	8.7	18.6	0	0	1	1	2	1	1	1	1	1	0	0	1	0	1	1	3	2	0	1	1	1	1	1	1	1	1	1	2	2	1	1	1	0	1	1	1	10	10	1	1	1
16	2	2008-10-06	142	40.6	2018-06-19	9.7	19.8	0	0	1	1	1	1	3	1	1	5	0	4	1	0	1	1	1	1	0	1	1	1	1	1	1	1	1	1	2	2	1	1	1	0	1	1	1	10	10	1	1	1
17	1	2009-02-14	133.5	25.9	2018-06-19	9.3	14.1	0	1	1	1	1	4	3	1	1	1	0	0	12	0	1	1	1	1	0	1	1	1	1	1	1	1	1	1	2	2	1	1	1	10	1	1	1	40	40	1	1	1
18	2	2009-05-26	133.5	27	2018-06-19	9	15.3	0	0	1	1	1	1	1	1	1	1	0	0	12	0	1	1	1	1	0	1	1	1	1	1	1	1	1	1	2	2	1	1	1	0	1	1	1	0	0	1	1	1
19	1	2009-05-21	132	26.7	2018-06-19	9	14.9	0	0	2	2	1	1	1	1	1	1	0	0	12	0	5	1	1	1	1	1	1	1	1	2	1	1	1	1	2	2	1	1	1	20	1	1	1	40	40	1	1	2
20	1	2008-04-15	132	21.8	2018-06-20	10.2	12.1	0	1	1	2	1	1	1	1	1	1	0	0	1	0	1	1	1	1	0	1	1	1	1	1	1	1	1	1	2	2	1	1	1	10	1	1	1	15	15	1	1	1
21	1	2009-02-17	128.5	24.8	2018-06-20	9.3	14.6	0	0	1	2	1	1	1	1	1	1	0	0	1	0	1	1	1	1	0	1	4	1	1	1	1	1	1	1	2	2	1	1	1	10	1	1	1	10	10	1	1	2
22	2	2008-11-28	142	30.5	2018-06-20	9.5	14.9	0	0	1	2	1	1	1	1	1	1	0	0	6	0	1	1	1	1	0	1	1	1	1	1	1	1	1	1	2	2	1	1	1	5	1	1	1	0	0	1	1	1
23	2	2009-06-14	141	29.8	2018-06-20	9	14.6	0	0	1	2	1	1	1	1	1	1	0	0	1	0	1	1	1	1	0	1	1	1	1	1	1	1	1	1	2	2	1	1	1	0	1	1	1	0	0	1	1	1
24	1	2008-09-16	134	31.5	2018-06-26	9.8	17.3	0	0	1	1	1	1	1	1	1	1	0	0	1	0	1	1	1	1	0	1	1	1	1	1	1	1	1	1	2	2	2	2	2	0	1	1	1	30	30	1	1	1
25	1	2008-10-25	135	28.5	2018-06-26	9.7	15.4	0	0	1	1	1	1	1	1	1	1	0	0	1	0	1	1	1	1	0	1	1	1	1	1	1	1	1	1	2	2	1	1	1	15	1	1	1	15	15	1	1	1
26	2	2008-08-12	137	30.4	2018-06-26	9.8	16	0	0	2	1	1	2	1	1	1	1	0	0	12	0	1	1	1	1	0	1	1	1	1	1	1	1	1	1	2	2	1	1	1	0	1	1	1	0	0	1	1	1
27	2	2009-06-22	136	32.7	2018-06-26	9	17.3	0	0	1	1	1	1	2	2	1	1	0	0	1	0	1	1	1	1	0	1	1	1	1	1	1	1	1	1	2	2	1	1	1	0	1	1	1	0	0	1	1	1
28	1	2009-04-19	132	28.4	2018-06-26	9.2	16.1	0	0	2	1	1	1	1	1	1	1	0	0	12	0	1	1	1	1	0	1	1	1	1	1	1	1	1	1	2	2	2	2	2	5	1	1	1	30	30	1	2	2
29	2	2009-02-17	149	37.2	2018-06-26	9.3	16.7	0	0	1	1	2	1	2	2	3	1	0	0	2	0	1	1	1	1	0	1	1	1	1	1	1	1	1	1	2	2	1	1	1	0	1	1	1	15	15	1	1	1
30	2	2009-06-20	135	28.3	2018-06-27	9	15.4	0	0	1	2	1	1	1	1	1	1	0	0	1	0	1	1	1	1	0	1	1	1	1	1	1	1	1	1	2	2	1	1	1	0	1	1	1	0	0	1	1	1
31	2	2008-12-05	137	28.5	2018-06-28	9.5	14.9	0	0	1	2	1	1	1	3	3	1	0	0	1	0	1	1	1	1	0	1	1	1	1	1	1	1	2	1	1	2	1	1	1	0	1	1	1	0	0	1	2	1
32	1	2009-04-24	130	30.1	2018-06-29	9.2	17.8	0	0	1	2	1	1	1	1	1	1	0	0	1	0	1	1	1	1	0	1	1	1	1	1	1	1	1	1	2	2	1	1	1	0	1	1	1	5	5	1	1	1
33	2	2008-10-01	141	33.8	2018-06-30	9.7	16.6	0	0	1	2	1	1	1	1	1	1	0	0	1	0	1	1	1	1	0	1	1	1	1	1	1	1	1	1	2	2	1	1	1	0	1	1	1	5	5	1	1	1
34	2	2009-06-24	137	32.2	2018-07-01	9	17	0	0	1	2	3	1	1	1	1	1	0	0	12	2	1	1	3	3	0	1	1	1	1	1	1	1	1	1	2	2	1	1	1	0	1	1	1	0	0	1	1	1
35	1	2008-12-08	137	33.2	2018-07-03	9.5	17.6	0	0	1	1	1	1	1	1	1	1	0	0	1	0	1	1	1	1	0	1	1	1	1	1	1	1	1	1	2	2	1	1	1	0	1	1	1	15	15	1	1	1
36	1	2009-05-06	134	29.5	2018-07-03	9.1	16.2	0	0	2	1	1	1	1	1	1	2	3	0	1	0	1	1	1	1	0	1	1	1	1	1	1	1	1	1	2	2	1	1	1	2	1	1	1	10	10	1	1	1
37	1	2008-10-13	144	30.8	2018-07-03	9.7	14.5	0	0	1	1	1	2	1	1	1	1	0	0	1	0	1	1	1	1	0	1	1	1	1	1	1	1	1	1	2	2	1	1	1	20	1	1	1	70	70	1	1	1
38	1	2008-10-27	137	40	2018-07-04	9.7	21.3	1	0	1	2	1	1	1	1	1	5	0	3	12	0	1	1	1	1	0	1	1	1	1	1	1	1	1	1	2	2	1	1	1	0	1	1	1	5	5	1	1	1
39	1	2008-09-16	141	32.5	2018-07-04	9.8	16.1	0	0	1	2	1	1	1	1	1	1	0	0	1	0	1	1	1	1	0	1	1	1	1	1	1	1	1	1	2	2	1	1	1	0	1	1	1	10	10	1	1	2
40	1	2008-09-16	137	27.8	2018-07-04	9.8	14.4	0	0	1	2	1	1	1	1	1	1	0	0	1	3	1	1	1	3	0	1	1	1	1	1	1	1	1	1	2	2	1	1	1	15	1	1	1	10	10	1	1	1
41	2	2008-11-18	141	29.4	2018-07-04	9.6	14.6	0	0	1	2	1	1	1	1	1	1	0	0	1	0	1	1	1	1	0	1	1	1	1	1	1	1	1	1	2	2	1	1	1	15	1	1	1	10	10	2	2	2
42	2	2009-08-22	136	30.9	2018-07-04	8.8	16.2	0	0	1	2	1	1	3	1	1	1	0	0	1	0	1	1	1	1	0	1	1	1	1	1	1	1	1	1	2	2	1	1	1	0	1	1	1	10	10	2	1	2
43	1	2008-10-29	135	29.4	2018-07-04	9.7	15.9	0	0	2	2	1	1	1	1	1	1	0	0	12	0	1	1	1	1	0	1	1	1	1	1	1	1	1	1	2	2	1	1	1	5	1	1	1	15	15	1	2	2
44	2	2008-11-19	136	37.9	2018-07-04	9.6	20	1	0	1	2	1	1	1	1	1	1	0	0	1	0	1	1	1	1	0	1	1	1	1	1	1	1	1	1	2	2	1	1	1	0	1	1	1	5	5	1	1	1
45	1	2009-03-10	143	31.9	2018-07-17	9.3	15.2	0	0	1	2	1	1	1	1	1	1	0	0	1	0	1	1	1	1	0	1	1	1	1	1	1	1	1	1	2	2	1	1	1	0	1	1	1	5	5	1	1	1
46	2	2008-09-15	137	31.7	2018-07-17	9.8	16.5	0	0	1	2	1	1	1	1	1	1	0	0	1	4	1	1	1	1	0	1	1	1	1	1	1	1	1	1	2	2	1	1	1	0	1	1	1	5	5	1	1	1
47	2	2009-04-27	144.5	44.9	2018-07-17	9.2	21.2	1	0	1	2	1	1	1	1	1	1	0	0	1	0	1	1	1	1	0	1	1	1	1	1	1	1	1	1	2	2	1	1	1	0	1	1	1	5	5	1	1	1
48	2	2008-10-25	133.5	28.1	2018-07-17	9.7	15.8	0	0	1	2	1	1	1	1	1	1	0	0	1	0	1	1	1	1	0	1	1	1	1	1	1	1	3	1	2	2	1	1	1	0	1	1	1	15	15	1	1	2
49	1	2008-12-07	148	54.5	2018-07-18	9.6	24.7	1	0	2	2	1	1	1	1	1	5	0	3	1	0	1	1	1	1	0	1	1	1	1	1	1	1	1	1	2	2	1	1	1	0	1	1	1	5	5	1	2	1
50	2	2009-07-24	136	32.4	2018-07-18	8.9	17.3	0	0	1	2	1	1	1	1	1	1	0	0	12	0	1	1	1	1	0	1	1	1	1	1	1	1	1	1	2	2	1	1	1	0	1	1	1	10	10	1	1	2
51	1	2009-04-21	141	37.6	2018-07-18	9.2	18.6	0	0	1	2	1	1	1	1	1	5	0	2	5	0	1	1	1	1	0	1	1	1	1	1	1	1	2	1	2	2	1	1	1	0	1	1	1	10	10	1	2	2
52	1	2009-07-03	144	37.2	2018-07-18	9	17.8	0	0	1	2	1	1	1	1	1	1	0	0	1	0	1	1	1	1	0	1	1	1	1	1	1	1	1	1	2	2	1	1	1	0	1	1	1	10	10	1	1	1
53	1	2009-06-01	146.5	48.8	2018-07-18	9.1	22.5	1	0	1	2	1	1	1	1	1	1	0	0	1	0	1	1	1	1	0	1	1	1	1	1	1	1	1	1	2	2	1	1	1	10	1	1	1	15	15	1	2	2
54	2	2008-03-03	145	39.5	2018-07-25	10.3	18.5	0	0	1	2	3	1	2	1	1	1	0	0	2	0	1	1	1	1	0	1	1	1	1	1	1	1	1	1	2	2	1	1	1	0	1	1	1	10	10	1	1	1
[truncated: 92 more columns]
